# Supplementary material for: Socioeconomic Deprivation and Invasive Breast Cancer Incidence by Stage at Diagnosis: A Possible Explanation to the Breast Cancer Social Paradox
Source: MDPI journal article supplement (doi:10.3390/cancers16091701), 2024-04-27

## SUPPLEMENTARY MATERIALS

**Supplementary Table S1.** Characteristics of breast cancer cases excluded from the study according to exclusion criteria.

| Characteristics                                   | Missing<br>TNM stage | Missing<br>F-EDI | Missing F-EDI<br>and TNM stage |
|---------------------------------------------------|----------------------|------------------|--------------------------------|
|                                                   | N (%)                | N (%)            | N (%)                          |
| <b>Cancer cases</b>                               | 1,088                | 323              | 5                              |
| <b>Age (y/o)</b>                                  |                      |                  |                                |
| 15-49                                             | 185 (17%)            | 58 (18%)         | 0 (0%)                         |
| 50-74                                             | 283 (26%)            | 188 (58%)        | 1 (20%)                        |
| 75+                                               | 620 (57%)            | 77 (24%)         | 4 (80%)                        |
| <b>Rurality of residence</b>                      |                      |                  |                                |
| Rural                                             | 265 (24%)            | 0 (0%)           | 0 (0%)                         |
| Urban                                             | 823 (76%)            | 323 (100%)       | 5 (100%)                       |
| <b>Mode of detection</b>                          |                      |                  |                                |
| Symptoms                                          | 640 (59%)            | 160 (50%)        | 3 (60%)                        |
| Organized screening                               | 65 (6%)              | 66 (20%)         | 0 (0%)                         |
| Opportunistic screening                           | 66 (6%)              | 71 (22%)         | 0 (0%)                         |
| Other                                             | 33 (3%)              | 17 (5%)          | 0 (0%)                         |
| Unknown                                           | 284 (26%)            | 9 (3%)           | 2 (40%)                        |
| <b>Stage</b>                                      |                      |                  |                                |
| I                                                 | -                    | 125 (39%)        | -                              |
| II                                                | -                    | 118 (37%)        | -                              |
| III-IV                                            | -                    | 80 (25%)         | -                              |
| <b>Socioeconomic deprivation (F-EDI quintile)</b> |                      |                  |                                |
| Q1 The most affluent                              | 215 (20%)            | -                | -                              |
| Q2                                                | 226 (21%)            | -                | -                              |
| Q3                                                | 224 (21%)            | -                | -                              |
| Q4                                                | 210 (19%)            | -                | -                              |
| Q5 The most deprived                              | 213 (20%)            | -                | -                              |

**Supplementary Table S2.** Age-standardised incidence rates of breast cancer per 100,000 women-year and 95% confidence intervals according to socioeconomic deprivation (F-EDI quintile) and rurality of the residence, by age group and stage at diagnosis (n=33,298; 2008-2015).

| Age group |           | Stage I             | Stage II            | Stage III-IV     | All-stages          |
|-----------|-----------|---------------------|---------------------|------------------|---------------------|
| y/o       |           | ASIR (95% CI)*      | ASIR (95% CI)*      | ASIR (95% CI)*   | ASIR (95% CI)*      |
| 15-49     | Q1        | 32.9 (30.5-35.4)    | 27.2 (25.0-29.5)    | 10.1 (8.7-11.4)  | 70.2 (66.6-73.9)    |
|           | Q2        | 31.0 (28.6-33.5)    | 24.0 (21.9-26.1)    | 11.7 (10.2-13.1) | 66.7 (63.1-70.2)    |
|           | Q3        | 30.4 (27.9-33.0)    | 24.3 (22.0-26.6)    | 10.2 (8.8-11.7)  | 65.0 (61.3-68.7)    |
|           | Q4        | 28.0 (25.8-30.2)    | 25.1 (23.0-27.1)    | 10.6 (9.2-11.9)  | 63.7 (60.4-67.0)    |
|           | Q5        | 26.0 (24.0-28.0)    | 21.6 (19.7-23.4)    | 9.6 (8.4-10.9)   | 57.2 (54.2-60.1)    |
|           | Urban     | 30.7 (29.5-31.9)    | 24.4 (23.3-25.4)    | 10.3 (9.6-10.9)  | 65.3 (63.6-67.1)    |
|           | Rural     | 27.6 (25.3-29.9)    | 25.5 (23.3-27.7)    | 11.0 (9.6-12.5)  | 64.1 (60.6-67.6)    |
|           | All areas | 30.0 (28.9-31.0)    | 24.6 (23.7-25.6)    | 10.5 (23.7-25.6) | 65.1 (63.5-66.6)    |
| 50-74     | Q1        | 203.6 (199.5-207.8) | 92.9 (90.1-95.7)    | 39.6 (37.8-41.4) | 336.1 (330.8-341.4) |
|           | Q2        | 188.1 (183.7-192.4) | 90.1 (87.1-93.1)    | 40.5 (38.5-42.5) | 318.7 (313.0-324.4) |
|           | Q3        | 183.5 (178.9-188.2) | 93.6 (90.3-96.9)    | 45.1 (42.8-47.4) | 322.2 (316.1-328.3) |
|           | Q4        | 177.2 (172.7-181.8) | 82.5 (79.4-85.6)    | 44.6 (42.3-46.9) | 304.3 (298.3-310.2) |
|           | Q5        | 163.9 (159.3-168.4) | 81.7 (78.5-84.9)    | 45.5 (43.1-47.9) | 291.0 (285.0-297.1) |
|           | Urban     | 187.1 (184.8-189.4) | 87.7 (86.1-89.2)    | 41.8 (40.7-42.8) | 316.5 (313.6-319.5) |
|           | Rural     | 176.7 (172.6-180.8) | 91.6 (88.7-94.6)    | 46.4 (44.3-48.5) | 314.7 (309.2-320.2) |
|           | All areas | 184.8 (182.8-186.8) | 88.5 (87.2-89.9)    | 42.8 (87.2-89.9) | 316.1 (313.5-318.7) |
| 75+       | Q1        | 107.4 (106.4-108.3) | 109.3 (108.3-110.3) | 74.9 (74.1-75.8) | 291.6 (290.0-293.2) |
|           | Q2        | 101.2 (100.3-102.1) | 100.1 (99.2-101.0)  | 84.6 (83.8-85.5) | 285.9 (284.4-287.5) |
|           | Q3        | 90.9 (90.0-91.8)    | 94.9 (94.0-95.8)    | 83.6 (82.8-84.5) | 269.4 (267.9-271.0) |
|           | Q4        | 100.2 (99.3-101.1)  | 93.4 (92.6-94.3)    | 86.3 (85.5-87.2) | 279.9 (278.4-281.4) |
|           | Q5        | 96.8 (95.9-97.8)    | 87.1 (86.2-88.1)    | 94.2 (93.2-95.1) | 278.2 (276.5-279.8) |
|           | Urban     | 103.1 (102.6-103.5) | 97.3 (96.9-97.8)    | 84.1 (83.6-84.5) | 284.5 (283.7-285.3) |
|           | Rural     | 83.2 (82.3-84.0)    | 94.1 (93.2-95.0)    | 88.4 (87.6-89.3) | 265.7 (264.2-267.3) |
|           | All areas | 99.1 (98.7-99.5)    | 96.7 (96.3-97.1)    | 84.9 (96.3-97.1) | 280.8 (280.1-281.5) |
| 15+       | Q1        | 79.5 (76.6-82.5)    | 46.7 (44.4-49.1)    | 19.6 (18.2-21.1) | 145.9 (141.9-150.0) |
|           | Q2        | 73.9 (70.9-76.9)    | 43.5 (41.1-45.8)    | 21.3 (19.7-22.9) | 138.7 (134.5-142.8) |
|           | Q3        | 72.1 (68.9-75.2)    | 44.4 (41.9-46.9)    | 21.4 (19.8-23.1) | 137.9 (133.5-142.3) |
|           | Q4        | 69.0 (66.0-71.9)    | 42.0 (39.7-44.4)    | 21.6 (20.0-23.3) | 132.6 (128.5-136.7) |
|           | Q5        | 63.9 (61.1-66.7)    | 39.1 (36.9-41.4)    | 21.4 (19.8-23.0) | 124.5 (120.6-128.4) |
|           | Urban     | 73.5 (72.0-75.0)    | 43.0 (41.8-44.2)    | 20.6 (19.8-21.4) | 137.1 (135.1-139.2) |
|           | Rural     | 68.1 (65.2-70.9)    | 44.7 (42.3-47.1)    | 22.5 (20.8-24.1) | 135.3 (131.2-139.3) |
|           | All areas | 72.3 (71.0-73.6)    | 43.4 (42.3-44.4)    | 21.0 (42.3-44.4) | 136.7 (134.9-138.6) |

\*F-EDI quintiles: from Q1 the most affluent to Q5 the most deprived

**Supplementary Table S3.** Incidence rate ratios (IRR) of breast cancer according to socioeconomic deprivation (F-EDI quintile), and rurality of the residence, by age group and stage at diagnosis (n=33,298; 2008-2015).

| Age group          |                 | Stage I            |                  | Stage II           |                  | Stage III-IV       |              | All-stages         |                  |
|--------------------|-----------------|--------------------|------------------|--------------------|------------------|--------------------|--------------|--------------------|------------------|
| y/o                |                 | IRR (95% CI)       | p                | IRR (95% CI)       | p                | IRR (95% CI)       | p            | IRR (95% CI)       | p                |
| 15-49 <sup>1</sup> | <b>F-EDI</b>    |                    | <b>&lt;0.001</b> |                    | <b>0.012</b>     |                    | 0.439        |                    | <b>&lt;0.001</b> |
|                    | Q1              | 1 (reference)      |                  | 1 (reference)      |                  | 1 (reference)      |              | 1 (reference)      |                  |
|                    | Q2              | 0.94 (0.85 – 1.04) |                  | 0.89 (0.79 – 0.99) |                  | 1.15 (0.97 – 1.36) |              | 0.95 (0.89 – 1.02) |                  |
|                    | Q3              | 0.91 (0.82 – 1.01) |                  | 0.89 (0.80 – 1.01) |                  | 1.02 (0.85 – 1.23) |              | 0.92 (0.85 – 0.99) |                  |
|                    | Q4              | 0.82 (0.73 – 0.91) |                  | 0.92 (0.82 – 1.03) |                  | 1.06 (0.88 – 1.28) |              | 0.89 (0.83 – 0.96) |                  |
|                    | Q5              | 0.73 (0.65 – 0.82) |                  | 0.80 (0.70 – 0.91) |                  | 0.99 (0.81 – 1.21) |              | 0.79 (0.73 – 0.86) |                  |
|                    | <b>Rurality</b> |                    | <b>&lt;0.001</b> |                    | 0.834            |                    | 0.646        |                    | <b>0.023</b>     |
|                    | Urban           | 1 (reference)      |                  | 1 (reference)      |                  | 1 (reference)      |              | 1 (reference)      |                  |
|                    | Rural           | 0.85 (0.78 – 0.93) |                  | 1.01 (0.92 – 1.11) |                  | 1.03 (0.90 – 1.19) |              | 0.94 (0.88 – 0.99) |                  |
| 50-74 <sup>1</sup> | <b>F-EDI</b>    |                    | <b>&lt;0.001</b> |                    | <b>0.013</b>     |                    | <b>0.020</b> |                    | <b>&lt;0.001</b> |
|                    | Q1              | 1 (reference)      |                  | 1 (reference)      |                  | 1 (reference)      |              | 1 (reference)      |                  |
|                    | Q2              | 0.93 (0.88 – 0.99) |                  | 0.96 (0.89 – 1.05) |                  | 1.02 (0.90 – 1.16) |              | 0.95 (0.90 – 1.00) |                  |
|                    | Q3              | 0.91 (0.85 – 0.97) |                  | 1.00 (0.92 – 1.09) |                  | 1.14 (1.01 – 1.29) |              | 0.97 (0.92 – 1.02) |                  |
|                    | Q4              | 0.86 (0.81 – 0.92) |                  | 0.89 (0.81 – 0.97) |                  | 1.15 (1.01 – 1.31) |              | 0.91 (0.86 – 0.95) |                  |
|                    | Q5              | 0.78 (0.72 – 0.83) |                  | 0.89 (0.81 – 0.98) |                  | 1.21 (1.06 – 1.38) |              | 0.86 (0.81 – 0.90) |                  |
|                    | <b>Rurality</b> |                    | <b>0.001</b>     |                    | 0.688            |                    | <b>0.009</b> |                    | 0.129            |
|                    | Urban           | 1 (reference)      |                  | 1 (reference)      |                  | 1 (reference)      |              | 1 (reference)      |                  |
|                    | Rural           | 0.91 (0.87 – 0.96) |                  | 1.01 (0.95 – 1.09) |                  | 1.14 (1.03 – 1.26) |              | 0.97 (0.93 – 1.01) |                  |
| 75+                | <b>F-EDI</b>    |                    | 0.065            |                    | <b>0.011</b>     |                    | 0.102        |                    | 0.186            |
|                    | Q1              | 1 (reference)      |                  | 1 (reference)      |                  | 1 (reference)      |              | 1 (reference)      |                  |
|                    | Q2              | 0.95 (0.83 – 1.09) |                  | 0.92 (0.80 – 1.05) |                  | 1.12 (0.96 – 1.32) |              | 0.99 (0.91 – 1.07) |                  |
|                    | Q3              | 0.86 (0.75 – 0.98) |                  | 0.87 (0.76 – 1.00) |                  | 1.10 (0.94 – 1.30) |              | 0.92 (0.85 – 1.01) |                  |
|                    | Q4              | 0.91 (0.79 – 1.03) |                  | 0.84 (0.74 – 0.97) |                  | 1.15 (0.98 – 1.35) |              | 0.94 (0.87 – 1.03) |                  |
|                    | Q5              | 0.83 (0.72 – 0.96) |                  | 0.78 (0.68 – 0.90) |                  | 1.26 (1.07 – 1.49) |              | 0.91 (0.83 – 1.00) |                  |
|                    | <b>Rurality</b> |                    | <b>&lt;0.001</b> |                    | 0.174            |                    | 0.112        |                    | 0.057            |
|                    | Urban           | 1 (reference)      |                  | 1 (reference)      |                  | 1 (reference)      |              | 1 (reference)      |                  |
|                    | Rural           | 0.81 (0.72 – 0.92) |                  | 0.92 (0.82 – 1.04) |                  | 1.10 (0.98 – 1.25) |              | 0.93 (0.87 – 1.00) |                  |
| 15+ <sup>1</sup>   | <b>F-EDI</b>    |                    | <b>&lt;0.001</b> |                    | <b>&lt;0.001</b> |                    | <b>0.007</b> |                    | <b>&lt;0.001</b> |
|                    | Q1              | 1 (reference)      |                  | 1 (reference)      |                  | 1 (reference)      |              | 1 (reference)      |                  |
|                    | Q2              | 0.93 (0.89 – 0.98) |                  | 0.93 (0.87 – 0.99) |                  | 1.08 (0.99 – 1.18) |              | 0.95 (0.92 – 0.99) |                  |
|                    | Q3              | 0.90 (0.85 – 0.95) |                  | 0.94 (0.88 – 1.00) |                  | 1.10 (1.01 – 1.20) |              | 0.94 (0.90 – 0.98) |                  |
|                    | Q4              | 0.86 (0.81 – 0.91) |                  | 0.89 (0.83 – 0.95) |                  | 1.13 (1.03 – 1.23) |              | 0.91 (0.87 – 0.95) |                  |
|                    | Q5              | 0.77 (0.72 – 0.82) |                  | 0.84 (0.78 – 0.90) |                  | 1.18 (1.08 – 1.29) |              | 0.85 (0.81 – 0.89) |                  |
|                    | <b>Rurality</b> |                    | <b>&lt;0.001</b> |                    | 0.884            |                    | <b>0.002</b> |                    | <b>0.008</b>     |
|                    | Urban           | 1 (reference)      |                  | 1 (reference)      |                  | 1 (reference)      |              | 1 (reference)      |                  |
|                    | Rural           | 0.89 (0.85 – 0.93) |                  | 1.00 (0.95 – 1.05) |                  | 1.11 (1.04 – 1.19) |              | 0.96 (0.92 – 0.99) |                  |

<sup>1</sup> adjusted by age classes (15-29, 30-39, 40-49, 50-59, 60-64, 65-74 and 75+ y/o)

IRR obtained from Poisson model with nested random at the municipality/IRIS level

F-EDI: from Q1 the most affluent to Q5 the most deprived

**Supplementary Figure S1.** Age-standardised incidence rates (ASIR) of breast cancer and 95% confidence intervals according to age group and rurality of residence, by stage at diagnosis (n=33,298; 2008-2015).

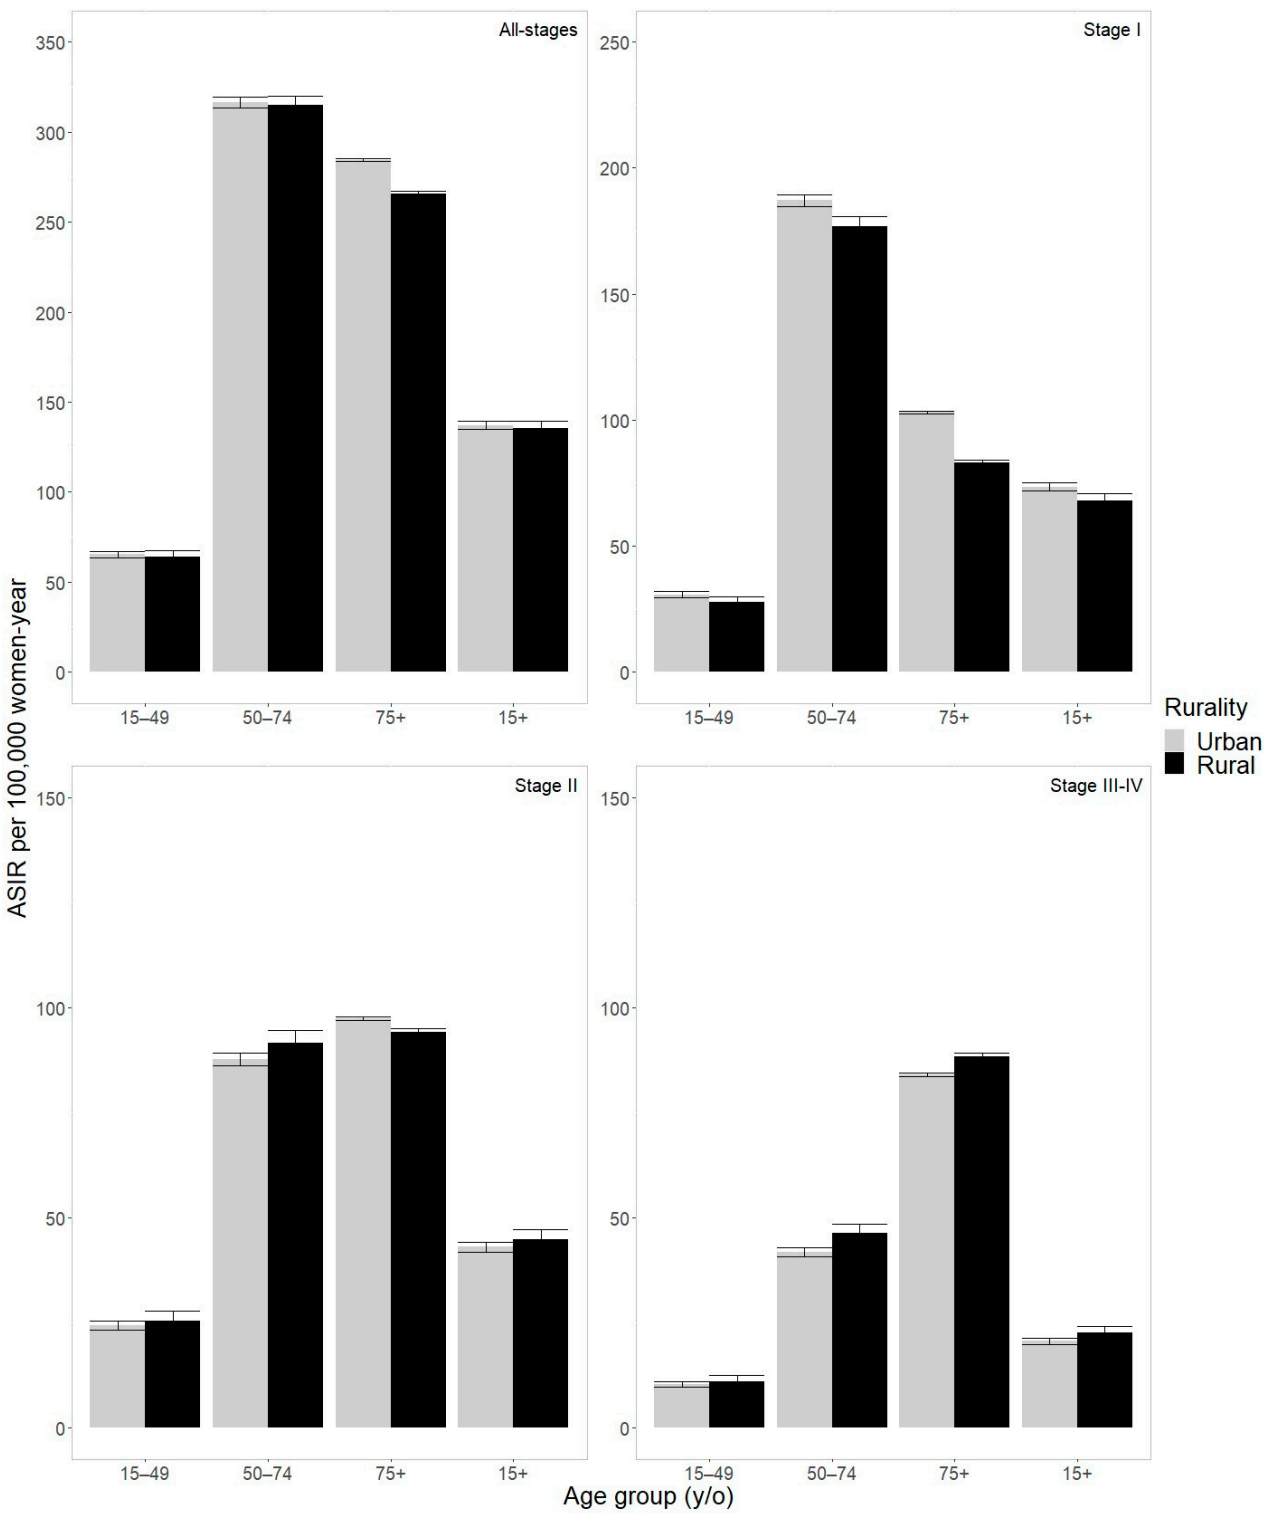

**Supplementary Figure S2.** Incidence rate ratios (IRR) and 95% confidence intervals according to age group and rurality of the residence, by stage at diagnosis (n=33,298; 2008-2015).

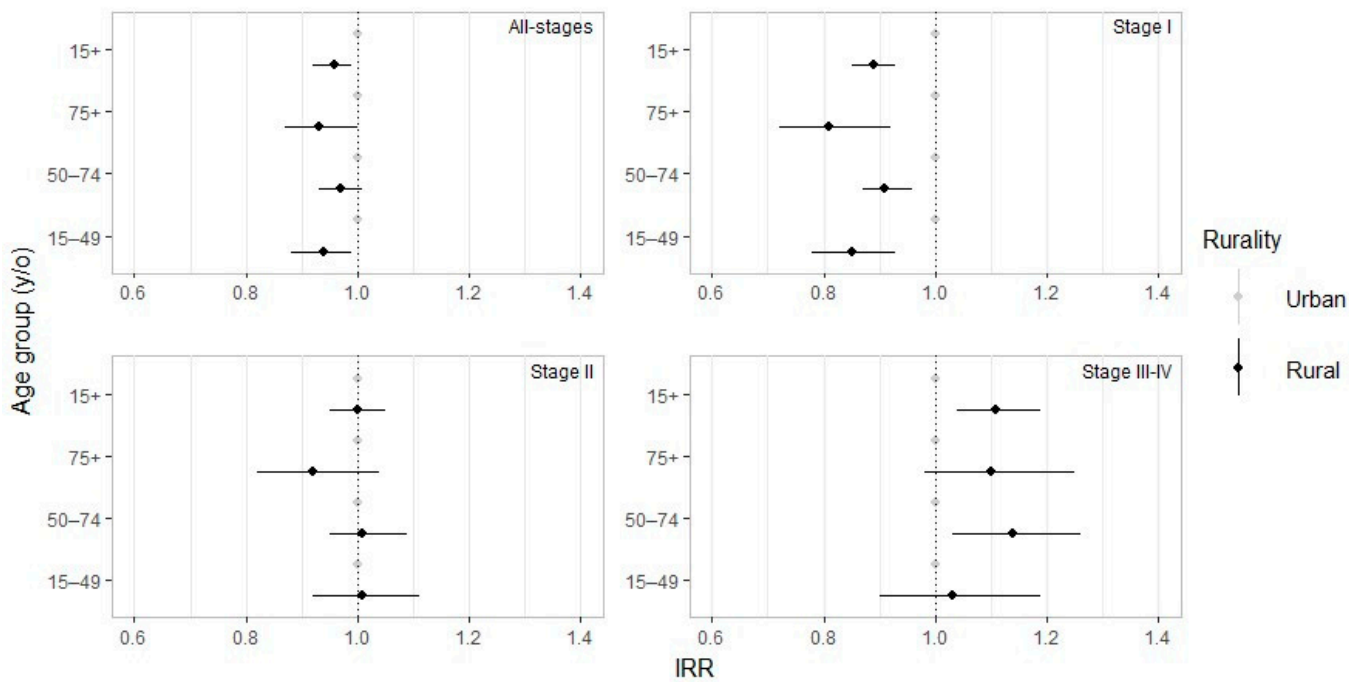

Supplement: s1 [file s1]
